# Supplementary material for: Focal Cortex Stimulation With a Novel Implantable Device and Antiseizure Outcomes in 2 Prospective Multicenter Single-Arm Trials
Source: PubMed Central journal article supplement — JAMA Neurol. 2023 Apr 3;80(6):588–96. doi: 10.1001/jamaneurol.2023.0066 (PMC10071400; doi:10.1001/jamaneurol.2023.0066), 2023-04-03
Supplement: jamaneurol-e230066-s001.pdf [file jamaneurol-e230066-s001.pdf]

# PROTOCOL

*Efficacy of neurostimulation with the **EASEE**® System to treat patients with medically refractory focal epilepsy: protocol for a prospective meta-analysis*

**EASEE Meta-Analysis**

**CV08-027**

**Version 01, 19 July 2021**

Authors:

Prof. Dr. Andreas Schulze-Bonhage  
Universitätsklinikum Freiburg, Neurozentrum  
Breisacher Str. 64  
79106 Freiburg  
Tel. +49-0761/270 53660  
Fax: +49-0761/ 270 50030  
[andreas.schulze-bonhage@uniklinik-freiburg.de](mailto:andreas.schulze-bonhage@uniklinik-freiburg.de)

Statistician:

Dr. rer. nat Carolin Jenkner  
Zentrum Klinische Studien (Clinical Trials Unit)  
Elsässerstraße 2  
79110 Freiburg  
Tel. +49-0761/270 77850  
Fax: +49-0761/ 270 73730  
[Carolin.jenkner@uniklinik-freiburg.de](mailto:Carolin.jenkner@uniklinik-freiburg.de)

This Protocol contains confidential information. Circulation of this material to individuals who are not involved in the carrying out of the study or any kind of publication requires the approval of the Sponsor. These limitations similarly relate to all confidential information and data which will be obtained in the future.

### Approval of the Meta-Analysis Protocol

**Clinical Author**

Prof. Dr. med. A. Schulze-  
Bonhage

Name

Signature



27/7/2021

Date

**Sponsor**

Dr. med. A. Liedler  
Precisis AG

Name

Signature

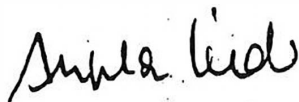

12 | 8 | 2021

Date

**Biometrics/Statistics**

Dr. rer. nat. Carolin Jenkner

Name

Signature



12/8/2021

Date

## Table of Contents

|                                                                      |           |
|----------------------------------------------------------------------|-----------|
| <b>Approval of the Meta-Analysis Protocol .....</b>                  | <b>2</b>  |
| <b>Table of Contents .....</b>                                       | <b>3</b>  |
| <b>Synopsis.....</b>                                                 | <b>4</b>  |
| <b>Revision History .....</b>                                        | <b>5</b>  |
| <b>Terms and abbreviations .....</b>                                 | <b>5</b>  |
| <b>References .....</b>                                              | <b>5</b>  |
| <b>1 Introduction .....</b>                                          | <b>6</b>  |
| 1.1 Background and Scientific Rationale.....                         | 6         |
| 1.2 Device Description.....                                          | 7         |
| 1.3 Clinical Studies Eligible for Meta-Analysis.....                 | 8         |
| The EASEE II Study                                                   | 8         |
| The PIMIDES I Study                                                  | 9         |
| <b>2 Methods .....</b>                                               | <b>9</b>  |
| 2.1 Study Design – Eligibility Criteria and Selection Process.....   | 9         |
| 2.2 Information Sources.....                                         | 10        |
| 2.3 Search strategy.....                                             | 10        |
| 2.4 Study records.....                                               | 10        |
| <b>3 Data-Items: Subject Population and Selection Criteria .....</b> | <b>10</b> |
| <b>4 Outcomes and Prioritization.....</b>                            | <b>10</b> |
| <b>5 Risk of bias in individual studies .....</b>                    | <b>11</b> |
| <b>6 Data Synthesis and Statistical Analyses.....</b>                | <b>11</b> |
| 6.1 Primary Endpoint .....                                           | 11        |
| 6.2 Safety and performance .....                                     | 11        |
| 6.3 Secondary Endpoints.....                                         | 12        |
| <b>7 Meta-Bias(es).....</b>                                          | <b>12</b> |
| <b>8 Confidence in Cumulative Evidence.....</b>                      | <b>12</b> |
| <b>9 Ethical and Legal Principles .....</b>                          | <b>13</b> |
| 9.1 Subject Informed Consent .....                                   | 13        |
| 9.2 Ethical and Regulatory Requirements .....                        | 13        |
| 9.3 Data Protection and Confidentiality .....                        | 13        |
| <b>10 Registry.....</b>                                              | <b>13</b> |
| <b>11 Administrative Agreements .....</b>                            | <b>13</b> |
| 11.1 Financing of the Project.....                                   | 13        |
| 11.2 Study Report – Final Meta-Analysis .....                        | 13        |
| <b>12 References.....</b>                                            | <b>14</b> |

## Synopsis

|                                          |                                                                                                                                                                                                                                                                                                                                                                                                                                                                                                                                                                                                                                                                                                                                                                                                                                                                                                                                                     |                                                                                          |
|------------------------------------------|-----------------------------------------------------------------------------------------------------------------------------------------------------------------------------------------------------------------------------------------------------------------------------------------------------------------------------------------------------------------------------------------------------------------------------------------------------------------------------------------------------------------------------------------------------------------------------------------------------------------------------------------------------------------------------------------------------------------------------------------------------------------------------------------------------------------------------------------------------------------------------------------------------------------------------------------------------|------------------------------------------------------------------------------------------|
| <b>STUDY TITLE</b>                       | Efficacy of neurostimulation with the <b>EASEE®</b> System to treat patients with medically refractory focal epilepsy: protocol for a prospective meta-analysis                                                                                                                                                                                                                                                                                                                                                                                                                                                                                                                                                                                                                                                                                                                                                                                     |                                                                                          |
| <b>ABBREVIATED TITLE</b>                 | <b>EASEE</b> meta-analysis                                                                                                                                                                                                                                                                                                                                                                                                                                                                                                                                                                                                                                                                                                                                                                                                                                                                                                                          |                                                                                          |
| <b>STUDY NUMBER/<br/>PROSPERO</b>        | <b>CV-08-027</b> / Prospero ID 266440                                                                                                                                                                                                                                                                                                                                                                                                                                                                                                                                                                                                                                                                                                                                                                                                                                                                                                               |                                                                                          |
| <b>INTENDED USE / MAIN<br/>DIAGNOSIS</b> | Treatment of medically refractory focal epilepsy                                                                                                                                                                                                                                                                                                                                                                                                                                                                                                                                                                                                                                                                                                                                                                                                                                                                                                    |                                                                                          |
| <b>OBJECTIVES</b>                        | The primary objective of this meta-analysis is to report on the efficacy, safety and performance of the EASEE® System for transcranial, subgaleal neurostimulation in subjects with medically refractory focal epilepsy, by analysing the data collected in two clinical studies (EASEE II, PIMIDES I).                                                                                                                                                                                                                                                                                                                                                                                                                                                                                                                                                                                                                                             |                                                                                          |
| <b>DESIGN</b>                            | Meta-analysis of safety and performance data collected in EASEE II and PIMIDES I, two clinical studies which are homogeneous in terms of participants, interventions and outcomes.                                                                                                                                                                                                                                                                                                                                                                                                                                                                                                                                                                                                                                                                                                                                                                  |                                                                                          |
| <b>KEY ENDPOINTS</b>                     | <p>Primary endpoint (efficacy):</p> <ul style="list-style-type: none"> <li>- Responder rate, defined as at least 50 % reduction of seizure frequency between month 6 and baseline month</li> </ul> <p>Safety:</p> <ul style="list-style-type: none"> <li>- device or procedure related Serious Adverse Events</li> <li>- all SAEs</li> <li>- all AEs</li> </ul> <p>Performance:</p> <ul style="list-style-type: none"> <li>- device implant duration</li> <li>- deficiency rate per device</li> </ul> <p>For details on endpoints see section 4.</p>                                                                                                                                                                                                                                                                                                                                                                                                |                                                                                          |
| <b>TIMETABLE</b>                         | Study conduct:                                                                                                                                                                                                                                                                                                                                                                                                                                                                                                                                                                                                                                                                                                                                                                                                                                                                                                                                      | EASEE II: August 2018 – May 2023<br>PIMIDES I: January 2020 – December 2023              |
|                                          | First statistical evaluation:                                                                                                                                                                                                                                                                                                                                                                                                                                                                                                                                                                                                                                                                                                                                                                                                                                                                                                                       | EASEE II (4-month safety): April 2021<br>EASEE II: August 2021<br>PIMIDES I: August 2021 |
|                                          | Results of meta-analysis:                                                                                                                                                                                                                                                                                                                                                                                                                                                                                                                                                                                                                                                                                                                                                                                                                                                                                                                           | August 2021                                                                              |
| <b>SAMPLE SIZE</b>                       | 30                                                                                                                                                                                                                                                                                                                                                                                                                                                                                                                                                                                                                                                                                                                                                                                                                                                                                                                                                  |                                                                                          |
| <b>STATISTICAL ANALYSIS</b>              | <p><u>Primary efficacy analysis</u></p> <p>The primary efficacy meta-analysis will be performed on the full analysis set (FAS), including all patients from both studies who underwent implantation with the device. Responder rate (defined as at least 50 % reduction in seizure rate from baseline) at 7 months post-implant (6 months of active stimulation) will be analysed as a repeated binary variable via generalised estimating equations.</p> <p><u>Safety</u></p> <p>Safety analyses will be performed on the safety set, including all patients who underwent implantation with the device. Adverse events will be coded using MedDRA and summarized by body system. The incidence of device/procedure related serious adverse events (SAE) for the surgical implantation procedure and the following 4 months will be summarized with corresponding exact one-sided 95 % confidence intervals based on a binominal distribution.</p> |                                                                                          |
| <b>ELIGIBILITY CRITERIA</b>              | All available clinical data from studies on the safety and performance of the EASEE® System (Precisis AG, Germany). Two clinical studies were identified as eligible: EASEE II and PIMIDES I. These two studies are homogeneous in terms of participants, interventions and outcomes. No further clinical studies will be considered for this prospective meta-analysis.                                                                                                                                                                                                                                                                                                                                                                                                                                                                                                                                                                            |                                                                                          |
| <b>INFORMATION SOURCES</b>               | No further information sources will be consulted.                                                                                                                                                                                                                                                                                                                                                                                                                                                                                                                                                                                                                                                                                                                                                                                                                                                                                                   |                                                                                          |
| <b>SEARCH STRATEGY</b>                   | No specific search strategy will be applied for identifying published research.                                                                                                                                                                                                                                                                                                                                                                                                                                                                                                                                                                                                                                                                                                                                                                                                                                                                     |                                                                                          |

## Revision History

Lists details of all protocol amendments whenever a new version of the protocol is produced.

| Protocol Version No. | Date        | Author(s) of changes                     | Modification Description |
|----------------------|-------------|------------------------------------------|--------------------------|
| 1.0                  | 19-JUL-2021 | Prof. Dr. med.<br>A. Schulze-<br>Bonhage | Initial Protocol Version |
|                      |             |                                          |                          |
|                      |             |                                          |                          |

## Terms and abbreviations

| Term or Abbreviation | Description                           |
|----------------------|---------------------------------------|
| AC                   | Alternating Current                   |
| ASM                  | Anti-Seizure Medication               |
| CA                   | Competent Authority                   |
| EC                   | Ethics Committee                      |
| EEG                  | Electroencephalography                |
| QOLIE-31-P           | Quality of Life in Epilepsy Inventory |
| (S)AE                | (Serious) Adverse Event               |
| SAP                  | Statistical Analysis Plan             |
| SSQ                  | Seizure severity Questionnaire        |
| ULFA                 | Ultra-low frequency asymmetric        |

## References

| Document identification | Description                           |
|-------------------------|---------------------------------------|
| CV08-006 v6             | EASEE II Clinical Investigation Plan  |
| CV08-017 v7             | PIMIDES I Clinical Investigation Plan |

# 1 Introduction

## 1.1 Background and Scientific Rationale

Epilepsy is a recurrent tendency to spontaneous, intermittent, abnormal electrical activity in the brain, manifesting as seizures. It is a common neurological disorder, affecting approximately 1 % of the population (Longmore M et al., 2014). Epileptiform discharges initially involve either a localized area of the brain resulting in a focal seizure or both cerebral hemispheres, resulting in a generalized seizure. In adults, the most common type is focal epilepsy (Panebianco M et al., 2015).

About two thirds of patients have a good prognosis to achieve satisfactory seizure control by treatment with anti-seizure medications (ASMs). Seizure control means reduction of seizure frequency and/or severity to the point that the patient can live a normal life without epilepsy-related limitations and with minimal or no drug toxicity (Greenberg MS, 2016). There are currently over 20 drugs for symptomatic treatment of epileptic seizures available.

In 30 % of patients with focal epilepsy, seizures are not effectively controlled by a single ASM and often require treatment with a combination of different ASMs (Shan et al., 2021; Stern et al., 2020). A failure of monotherapy indicates an 80 % risk that seizures will not be controllable pharmacologically. In contrast, increased drug load, due to polytherapy in patients non-responsive to antiepileptic treatment in monotherapy, often leads to an increased rate of medication-related adverse effects, such as cognitive impairment or mood disturbance (Eddy et al., 2011). In addition, patients with pharmaco-resistant epilepsy have an increased risk of premature death, injuries, drowning, psychosocial dysfunction and reduced quality of life (Löscher et al. 2020).

Therefore, non-pharmacological treatments are becoming increasingly attractive for patients with pharmaco-resistant epilepsy. Epilepsy surgery is one option with high success rates. However, the procedure can be performed only in a limited number of patients and carries risks for functional domain-specific deficits, depending on the regions of the brain which have been resected or disconnected (Loring DW et al., 2015). For those patients who are not surgical candidates, or refuse resective surgery, or continue to have seizures after surgery, neurostimulation may offer an alternative treatment option (Sprengers M et al., 2014, Salanova V et al., 2015; Stefan H et al., 2012).

Over the last 25 years, the clinical efficacy of electrical stimulation of the vagus nerve and deep brain structures for the treatment of several neurologic and psychiatric conditions, including epilepsy, depression, and Parkinson disease, has been extensively investigated (Schulze-Bonhage, Seizure 2017). Both extracranial stimulation, (including vagus nerve and transcranial direct current stimulation) as well as intracranial stimulation (deep brain and cortical stimulation) have been applied as adjunctive treatment options for medically refractory epilepsy. These devices have successfully completed pivotal efficacy and safety trials and are commercially available in Europe or the USA (Wong, Neurotherapeutics, 2019). Despite their potential clinical benefit, the mechanisms by which deep brain stimulation and other forms of neurostimulation modulate neuronal activity remain unknown (Sohal VS et al., 2011). Direct interaction with oncoming seizures may be a potential mechanism. About 15 % of patients are able to feel the seizure onset and are therefore able deliver additional stimulation at this time for example via the vagus nerve stimulation activation magnet (Fisher, Acta Neurol Scand, 2015).

A novel implantable extra-cranial and subgaleal neurostimulation therapy has been developed recently. The EASEE® system (Precisis AG, Heidelberg, Germany) is being used in two ongoing multicentre clinical studies: EASEE II and PIMIDES I (both single arm studies). The two studies are identical in terms of eligibility criteria, study device and study procedures, except for inclusion of patients who are aware of early seizure symptoms and can initiate an additional bolus stimulation in PIMIDES I. Both studies have completed enrolment and the follow-up required for primary safety endpoint analysis.

The goal of this meta-analysis is to evaluate initial efficacy, safety and performance of this novel therapy based on all clinical data available in patients with medically refractory focal epilepsy.

In epilepsy studies that evaluate drugs or medical devices, a  $\geq 50$  % reduction in seizure frequency is often used as the outcome measure to assess treatment efficacy and defines the responder rate (Wong, Neurotherapeutics, 2019). Other efficacy endpoints reported by medical device studies include the reduction in seizure frequency over time, neuropsychiatric, mood and memory effects and shall be evaluated in this meta-analysis along with the safety and performance data.

## 1.2 Device Description

The EASEE® System (**E**picranial **A**pplication of **S**timulation **E**lectrodes for **E**pilepsy) is an implantable neuromodulation device, which is intended for the treatment of medically refractory focal epilepsy in adults.

The EASEE® System consists of:

- The implantable components: EASEE® Power (the implantable pulse generator) and EASEE® Lead (electrode array and connecting link). EASEE® Lead has a specific design which allows it to be placed subgaleally on the skull surface and to transmit electrical stimulation through the skull bone to the grey matter of the neocortex. EASEE® Lead consists of five single disc electrodes arranged in a silicone matrix and linked to a five-polar cable.
- The surgical tools: EASEE® Template (tool for determining implant location), a torque wrench and a screw/screwdriver set (tool used to fix the array onto the skull) and a tunneling tool (for the subcutaneous routing of the connecting link from the electrode implant location on the skull to the implantable pulse generator location in the subclavian region).
- The external control elements: EASEE® Set (physician programmer), EASEE® Connect (telemetry wand for physician), EASEE® Access (patient remote control for device status check and/or request of bolus stimulation) and an Activation Magnet (for activation of the device by the physician).

The EASEE® System provides a stimulation scheme that combines AC (alternating current) and ULFA (ultra-low frequency asymmetric) stimulation. AC stimulation is applied continuously throughout the day (0.5 seconds every two minutes) with the exception of the time required for the ULFA burst and consists of a short burst of bipolar rectangular current controlled pulses with a pulse width of 160  $\mu$ s and a frequency of 100 Hz. ULFA stimulation is delivered once a day for 20 min and consists of an asymmetric 20 ms rectangular active pulse, followed by a 100 ms charge equalization pulse at 1/5<sup>th</sup> of the current amplitude used for the active pulse, corresponding to pulse frequency of 8Hz. All pulses are supplied with constant, programmable current.

Furthermore, when allowed in the study, patients can directly request additional “bolus stimulation” bursts via the EASEE® Access remote control (“patient controlled neurostimulation”). These bursts have the same parameter as the AC bursts with the exception of the burst duration, which can be programmed between 10 s and 60 s. The patient can request additional stimulation bolus once every 2 minutes, and for a maximum total duration of 6 min per day.

EASEE Power logs several data points, including all stimulation parameter settings, the daily applied stimulation bursts, time and date of each received bolus stimulation request, as well as the electrode’s impedances.

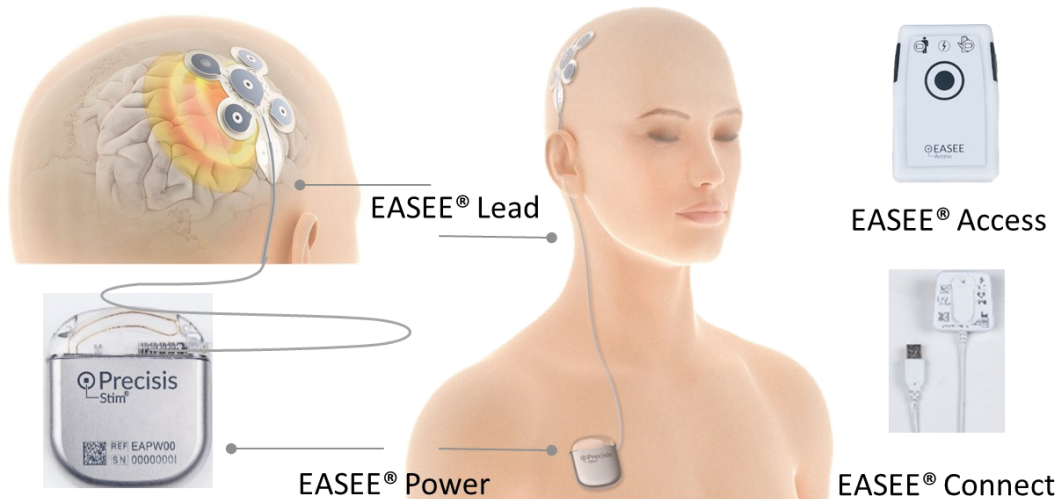

**Figure 1 EASEE System elements**

The fixation screws, the screwdriver set, the tunneling tool and the Activation Magnet are CE-marked accessories. All other elements of the EASEE® System were used for the first time within clinical investigations in Europe as of 2019 and do not have market approval.

### 1.3 Clinical Studies Eligible for Meta-Analysis

Two clinical studies investigating the safety and performance of the EASEE® System for the treatment of medically refractory focal epilepsy were identified: the EASEE II and the PIMIDES I clinical investigations. The study designs and current status are summarized below.

#### The EASEE II Study

- EASEE II is a first-in-human, prospective, interventional, unblinded, multicenter study conducted in Germany and Belgium.
- The study collects data on 15 subjects implanted with the EASEE® System and followed for 36 months post-implant. The study design and statistical analysis plan are described in the protocol.
- The primary endpoint is the safety defined as the number of SAEs of the EASEE® System evaluated at 4 months post-implant.
- The secondary endpoints are:
  - Seizure frequency, responder rate<sup>1</sup> and seizure severity at baseline compared to respective values at 4-, 8-, 16-, 24-, and 36 months post-implant.
  - Quality of life, mood and neurocognition at baseline compared to respective values at 8-, 16-, 24-, and 36 months post-implant.
  - Epileptiform activity (scalp EEG) at baseline compared to data collected at 1-, 8-, 16-, 24-, and 36 months post-implant.
- The EASEE II clinical investigation plan and related study documentation were initially approved by the German Competent Authority (CA, BfArM) in August 2018 and by the ethics committee (EC) in September 2018. The Patient Informed Consent of the study allows the sponsor and manufacturer of the device, Precisus AG, to undertake further research and to use the data for CE marking file. The trial is registered in the German Clinical Trials Register (DRKS) under the number 00015918 ([https://www.drks.de/drks\\_web/setLocale\\_EN.do](https://www.drks.de/drks_web/setLocale_EN.do)).

<sup>1</sup> responder rate: defined as at least 50 % reduction in seizure rate from baseline



- The enrollment of 15 subjects was completed in January 2020; the long-term follow-up of patients is ongoing.

**The PIMIDES I Study**

- PIMIDES I is a prospective, interventional, unblinded, multicenter international study in Germany and Belgium.
- The study collects data on 18 subjects implanted with the EASEE® System and followed for 36 months post-implant. The study design and statistical analysis plan are described in the protocol.
- The primary endpoint is the safety defined as the number of device/procedure related SAEs of the EASEE® System evaluated at 4 months post-implant.
- The secondary endpoints will assess the same parameters as the EASEE-II study.

The PIMIDES I design is identical to the EASEE II design, with the exception of the following aspects:

- EASEE® System includes patient-controlled bolus stimulation.
- One additional inclusion criterion, which requires that patients are able to apply bolus stimulation during their seizures (intact consciousness at least during part of a habitual seizure type, as well as motor ability to operate the device to trigger stimulation in this phase).
- An optional extension of the neuropsychological test battery which includes *Intelligence (MWT-B/A)*, *Executive functions (RWT semantic, 5-points test)*, *Memory (VLMT, DCS-R, Subtest Digit spans and Block spans)*, *Language (BNT, speech comprehension)*, *Visuospatial function (block design, VSWin)*, *Motor functions (Perdue Pegboard)*, *CES-D*

The common clinical study timepoints in EASEE II and PIMIDES I are presented in the Figure 2 below.

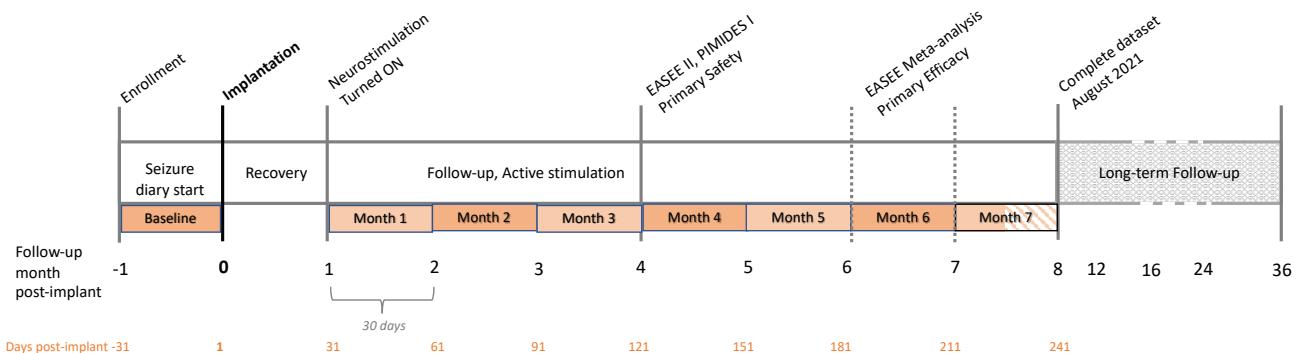

**Figure 2 Timepoints in EASEE II and PIMIDES I clinical studies**

The aim of this meta-analysis is to evaluate the efficacy, safety and performance of neurostimulation with the EASEE® System to treat patients with medically refractory focal epilepsy.

Seizure burden is the critical aspect that impacts the lives of patients with focal epilepsy, therefore the clinical performance evaluated according to different seizure burden measures will be the main focus of the meta-analysis. Additionally, any common endpoints from the original studies will be analyzed.

**2 Methods**

**2.1 Study Design – Eligibility Criteria and Selection Process**

Studies will be selected according to the following procedure: all studies using the EASEE System® will be included. Two studies are either started or are planned but were not analysed yet. Both are prospective, single arm studies investigating the safety and performance of the EASEE® System (see 1.3).

The same inclusion and exclusion criteria, research hypotheses and endpoints ensure comparability of the data collected from the two studies. In addition, identical stimulation devices were used with an additional trigger mode enabled in the PIMIDES I trial, the mechanisms of action of the stimulation are therefore identical in the two studies. That is, first, Ultra-Low Frequency Asymmetric stimulation enables seizure frequency reduction in patients with medically refractory focal epilepsy. Second, Alternative Current stimulation influences seizure severity independent of its mode of application via the stimulation device (continuously, on demand). All further technical details of the stimulation devices are identical as is the case for the expected safety of the devices of the EASEE® system.

## 2.2 Information Sources

No systematic literature search will be performed. All ongoing studies are run by Precisis AG. Information on trial design (trial protocol, informed consent, etc.) will be provided by the company.

## 2.3 Search strategy

Not applicable.

## 2.4 Study records

Information about trial patients will be kept confidential and managed under the applicable laws and regulations. The data collection system for both studies which are included in this meta-analysis use built-in security features to encrypt all data for transmission in both directions, preventing unauthorized access to confidential patient information. Access to the system will be controlled by individually assigned user identification codes and passwords, made available only to authorized personnel who have completed prerequisite training.

The analysis of both individual studies will be performed according to respective Statistical Analysis Plans on all available data. Data will then be merged on an individual patient level. All patients included in the individual studies will be kept for the meta-analysis.

At the point of writing the protocol of this meta-analysis no data and results were available to the authors of this protocol.

## 3 Data-Items: Subject Population and Selection Criteria

Data on all design aspects of the clinical trial will be collected and compared (inclusion / exclusion criteria, research question, funding source, pre-planned assumptions).

## 4 Outcomes and Prioritization

The primary aim of this meta-analysis is to analyse the seizure burden reduction as defined by the responder rate ( $\geq 50$  % of seizure reduction respective to baseline) in patients receiving treatment with the EASEE® System for medically refractory focal epilepsy.

Details of all objectives and related endpoints can be found in the table below.

|                  | Objective                        | Endpoint                                                                                                                                                      |
|------------------|----------------------------------|---------------------------------------------------------------------------------------------------------------------------------------------------------------|
| <b>Primary</b>   | Assess changes in seizure burden | Responder rate, defined as at least 50 % reduction of seizure frequency between month 6* and baseline month                                                   |
| <b>Secondary</b> | Assess changes in seizure burden | Seizure frequency: <ul style="list-style-type: none"> <li>median percent seizure reduction at month 6 of active therapy compared to baseline month</li> </ul> |

|                    | Objective                                     | Endpoint                                                                                                                                                                              |
|--------------------|-----------------------------------------------|---------------------------------------------------------------------------------------------------------------------------------------------------------------------------------------|
|                    |                                               | <ul style="list-style-type: none"> <li>mean percent seizure reduction at month 6 of active therapy compared to baseline month</li> </ul>                                              |
|                    | Assess changes in seizure severity            | Seizure severity (SSQ): seizure severity at 4-, 8-, 16-, 24- and 36-months post-implant compared to baseline seizure severity                                                         |
|                    | Assess modulation of focal epileptic activity | Epileptiform activity (scalp EEG): baseline measurements of epileptiform activity compared to data collected at 1 month and 8 months post-implant.                                    |
|                    | Assess changes in quality of life             | QOLIE-31-P: baseline subject rated quality of life compared to 8 months post-implant.                                                                                                 |
|                    | Assess changes in mood                        | Mood (NDDI-E): baseline subject rated mood compared to 8-, 16-, 24- and 36 months post-implant.                                                                                       |
|                    | Assess changes in cognitive functioning       | Neurocognition: baseline neurocognition compared to 8 months post- implant.                                                                                                           |
| <b>Safety</b>      | Assess device safety and performance          | <ul style="list-style-type: none"> <li>device or procedure related SAEs, all SAEs, AEs at 1 month, 4-, 8-, 12-, 16-, 24- and 36-months post-implant</li> </ul>                        |
| <b>Performance</b> | Assess device performance                     | <ul style="list-style-type: none"> <li>number of devices per patient and procedure</li> <li>implant procedure duration</li> <li>device deficiency</li> <li>device duration</li> </ul> |

\* Month 6 of active therapy: neurostimulation starts after 30 days, hence month 6 corresponds to day 181–211 post-implant, data being collected at 8-month follow-up (+/- 2 weeks), for details see Figure 2 above.

## 5 Risk of bias in individual studies

Patients enrolled in the selected studies for the meta-analysis are all medication-refractory for focal epilepsy. Nevertheless, their medication regime and medical characteristics might differ.

## 6 Data Synthesis and Statistical Analyses

Before the start of the final analysis a detailed statistical analysis plan (SAP) will be prepared. If the SAP contains any changes to the analyses outlined in the trial protocol, they will be marked as such, and reasons for amendments will be given. All statistical programming for analysis will be performed with the Statistical Analysis System (SAS).

The statistical population to be investigated is defined according to the intended use of the investigational device as well as the inclusion and exclusion criteria of the study. The full analysis set (FAS) includes all patients who had an implantation of the EASEE® System regardless of what happened after the surgery.

### 6.1 Primary Endpoint

The analysis of the primary endpoint (responder rate) will be per individual. As only single arm studies will be included, no further aspects for combining different types of studies have to be considered. An individual participant data meta-analysis for the responder rate at 7 months post-implant (6 months of active stimulation) using a restricted maximum likelihood (REML)-based mixed model for repeated measures will be performed, including the trial as fixed effect and a random subject effect.

### 6.2 Safety and performance

Safety analyses will be performed in the safety set including all patients for whom the surgery was performed. Adverse events will be coded with MedDRA and summarized by body system. The incidence of device/procedure

related serious adverse event (SAE) for the surgical implant procedure and the following 4 to 36 months will be summarized with corresponding exact one-sided 95 % confidence intervals based on a binominal distribution. Incidence of AEs and SAEs will be analyzed in a similar way. Descriptive analyses of the number of devices per patient and procedure, the implant procedure duration, device duration and device deficiency will be performed.

### 6.3 Secondary Endpoints

Seizure frequency (mean and median changes in seizure frequency compared to baseline (-30 to day -1)) at 4 months, 7 months (181 to 211 days post-implant), 8 months, 12 months, 16 months, 24 months and 36 months post-implant will be analysed via the monthly (defined as 30 days) count of seizures for each subject, calculated from the seizure diary. A mixed-effects Poisson regression model will be used to analyse the monthly count data. Additionally, frequencies will be displayed descriptively in summary tables at baseline, 4 months, 7 months, 8 months, 12 months, 16 months, 24 months, 36 months and for changes to baseline.

Seizure severity at baseline, 4-, 8-, 16-, 24- and 36-months post-implant. Seizure severity questionnaire (SSQ) will be displayed descriptively compared to baseline for each patient.

Epileptiform activity: scalp EEG data will be analyzed descriptively.

Quality of Life in Epilepsy Inventory (QOLIE-31-P) at baseline, 8-, 16-, 24- and 36-months post-implant. The post-implant scores will be compared to baseline for each patient.

Mood: subjects complete the Neurological Disorder Depression Inventory for Epilepsy (NDDI-E) survey at baseline, 8-, 16-, 24- and 36-months post-implant. The post-implant scores will be compared descriptively to baseline for each patient.

Neurocognition: subjects complete a battery of cognitive tests (for example EpiTrack®) at baseline, 8-, 16-, 24- and 36-months post-implant. The post-implant scores will be compared to baseline for each patient.

SSQ, QOLIE-31-P, Mood and Neurocognition will be analysed using a linear mixed model for repeated measures, including a fixed trial and centre effect and a random patient effect in a similar fashion as the analysis of the seizure frequency.

It should be emphasised that as little patients as possible should discontinue treatment and that all patients should be followed up and also documented after discontinuation of the treatment in order to record data required. The clinical heterogeneity will be tested by considering the variability in participant factors in the studies (age, sex, etc.).

## 7 Meta-Bias(es)

The fact that patients from the PIMIDES I trial can decide to enable therapy with a limited amount of additional neurostimulation per day may lead to better study results or alternatively to increased side effects.

The population characteristics of both initial studies shall be reported and analyzed for heterogeneity.

## 8 Confidence in Cumulative Evidence

Results of the EASEE II and PIMIDES I study will be assessed concerning the risk of bias in individual studies (see chapter 6), the consistency of results between studies, and the precision of trial results.

## **9 Ethical and Legal Principles**

### **9.1 Subject Informed Consent**

The EASEE II and PIMIDES I individual trial data will be collected based on a broad consent procedure in which patients are informed that their data can be reused anonymously for scientific purposes.

### **9.2 Ethical and Regulatory Requirements**

In Germany, there is no obligation to obtain regulatory approval for a meta-analysis on clinical data.

### **9.3 Data Protection and Confidentiality**

The pertinent provisions on data protection must be fully complied with.

Patients of the EASEE II and PIMIDES I studies were informed of the purpose and extent of the data collection, the (re-)use of personal data, particularly medical data, and their individual rights according to EU data protection regulation.

For the protection of these data, organizational measures have been taken to prevent disclosure to unauthorized third parties. For example, the subject data is captured in pseudonymized form (subject ID No. for the study, year of birth) throughout the documentation and evaluation phase.

Data will be analyzed anonymously for this meta-analysis.

## **10 Registry**

The Sponsor will ensure that the key design elements of this protocol are posted in a publicly accessible registry, such as PROSPERO. Reporting guidelines will be taken into account (see [www.equator-network.org](http://www.equator-network.org)), e.g. the PRISMA statement should be adhered to in the preparation of papers on the results of transparent reporting of systematic reviews and meta-analyses.

## **11 Administrative Agreements**

### **11.1 Financing of the Project**

The prospective meta-analysis will be financed by Precisis AG. The funders do not control the final decision regarding any of aspects of the meta-analysis: design, conduct, data analysis and interpretation of results.

### **11.2 Study Report – Final Meta-Analysis**

After completion of the analysis by the responsible biostatistician, Prof. Dr. Schulze-Bonhage (medical writer) will prepare and sign the final integrated medical and statistical report jointly with the biostatistician.

Except when required by law, the Sponsor will not disclose the results of the study to third parties unless all parties involved have first agreed on the results of the analysis and their interpretation.

All results of this meta-analysis will remain sole property of the Sponsor and may be used only by the Sponsor, including their use in publications, communications or in submissions to any regulatory authorities or other governmental agencies. Data may be published (in writing) by the Sponsor in collaboration with the investigators and Clinical Trials Unit, after consideration of comments from all relevant parties.

The Sponsor supports the exercise and academic freedom and recognizes the investigators interest in making publications and presentations relating to this meta-analysis.

## 12 References

- Boethig, D., & Hecker, H. (2019). Multiply adjusted comparisons: A meta-analysis method to compare single-arm clinical-trial data to literature results regarding a competitor. *Statistical Methods in Medical Research*, 28(3), 644–669. <https://doi.org/10.1177/0962280217733776>
- Eddy CM, Rickards HE, Cavanna AE. The cognitive impact of antiepileptic drugs. *Ther Adv Neurol Disord*. 2011 Nov;4(6):385-407. doi: 10.1177/1756285611417920. PMID: 22164192; PMCID: PMC3229254
- Fisher RS, Eggleston KS, Wright CW. Vagus nerve stimulation magnet activation for seizures: a critical review. *Acta Neurol Scand*. 2015 Jan;131(1):1-8. doi: 10.1111/ane.12288. Epub 2014 Aug 22. PMID: 25145652
- Greenberg MS. *Handbook of Neurosurgery*. Eighth Edition. Thieme Medical Publishers, Inc., 2016. Part VIII, chapter 26: seizure, p: 440-460; part XXIII, chapter 100:seizure surgery: p. 1553-1559
- Loring DW, Kapur R, Meador KJ, Morrell MJ. Differential neuropsychological outcomes following targeted responsive neurostimulation for partial-onset epilepsy. *Epilepsia*. 2015 Nov; 56(11):1836-44
- Löscher W. Epilepsy and Alterations of the Blood-Brain Barrier: Cause or Consequence of Epileptic Seizures or Both? *Handb Exp Pharmacol*. 2020 Nov 3. doi: 10.1007/164\_2020\_406. Epub ahead of print. PMID: 33136189
- Panebianco M, Rigby A, Weston J, Marson AG. Vagus nerve stimulation for partial seizures. *Cochrane Database Syst Rev*. 2015 Apr 3;(4):CD002896
- Probstfield, J., Applegate, W. B. (1995) Prospective Meta-Analysis: Ahoy! A Clinical Trial? *JAGS* 43:452-453
- Salanova V, Witt T, Worth R, Henry TR, Gross RE, Nazzaro JM, Labar D, Sperling MR, Sharan A, Sandok E, Handforth A, Stern JM, Chung S, Henderson JM, French J, Baltuch G, Rosenfeld WE, Garcia P, Barbaro NM, Fountain NB, Elias WJ, Goodman RR, Pollard JR, Tröster AI, Irwin CP, Lambrecht K, Graves N, Fisher R; SANTE Study Group.. Long-term efficacy and safety of thalamic stimulation for drug-resistant partial epilepsy. *Neurology*. 2015 Mar 10;84(10):1017-25
- Schulze-Bonhage A. Brain stimulation as a neuromodulatory epilepsy therapy. *Seizure*. 2017 Jan;44:169-175. doi: 10.1016/j.seizure.2016.10.026. Epub 2016 Nov 14. PMID: 27876408.
- Shan W, Mao X, Wang X, Hogan RE, Wang Q. Potential surgical therapies for drug-resistant focal epilepsy. *CNS Neurosci Ther*. 2021 Jun 7. doi: 10.1111/cns.13690. Epub ahead of print. PMID: 34101365.
- Sohal VS, Sun FT. Responsive neurostimulation suppresses synchronized cortical rhythms in patients with epilepsy. *Neurosurg Clin N Am*. 2011 Oct;22(4):481-8
- Sprengers M, Vonck K, Carrette E, Marson AG, Boon P. Deep brain and cortical stimulation for epilepsy. *Cochrane Database Syst Rev*. 2014 Jun 17;(6):CD008497
- Stefan H, Kreiselmeyer G, Kerling F, Kurzbuch K, Rauch C, Heers M, Kasper BS, Hammen T, Rzonsa M, Pauli E, Ellrich J, Graf W, Hopfengärtner R. Transcutaneous vagus nerve stimulation (t-VNS) in pharmacoresistant epilepsies: a proof of concept trial. *Epilepsia*. 2012 Jul;53 (7):e115-8
- Stewart GB, Altman DG, Askie LM, Duley L, Simmonds MC, et al. (2012) Statistical Analysis of Individual Participant Data Meta-Analyses: A Comparison of Methods and Recommendations for Practice. *PLOS ONE* 7(10): e46042

K. K. Steinberg, S. J. Smith, D. F. Stroup, I. Olkin, N. C. Lee, G. D. Williamson, S. B. Thacker, Comparison of Effect Estimates from a Meta-Analysis of Summary Data from Published Studies and from a Meta-Analysis Using Individual Patient Data for Ovarian Cancer Studies, *American Journal of Epidemiology*, Volume 145, Issue 10, 15 May 1997, Pages 917–925,

Stern JM, Sankar R, eds, Sperling M, assoc ed. *Medication-Resistant Epilepsy: Diagnosis and Treatment*. Cambridge – New York – Port Melbourne et al, Cambridge University Press 2020

Turok, D. K., Espey, E., Edelman, A., Lotke, P. S., Lathrop, E. H., Teal, S. B., ... Schulz, K. F. (2011). The methodology for developing a prospective meta-analysis in the family planning community. *Trials*, 12, [104]. <https://doi.org/10.1186/1745-6215-12-104>

Wong S, Mani R, Danish S. Comparison and Selection of Current Implantable Anti-Epileptic Devices. *Neurotherapeutics*. 2019 Apr;16(2):369-380. doi: 10.1007/s13311-019-00727-2. PMID: 31062294; PMCID: PMC6554379.
