# Supplementary material for: Focal Cortex Stimulation With a Novel Implantable Device and Antiseizure Outcomes in 2 Prospective Multicenter Single-Arm Trials
Source: PubMed Central journal article supplement — JAMA Neurol. 2023 Apr 3;80(6):588–96. doi: 10.1001/jamaneurol.2023.0066 (PMC10071400; doi:10.1001/jamaneurol.2023.0066), 2023-04-03
Supplement: jamaneurol-e230066-s005.pdf [file jamaneurol-e230066-s005.pdf]

**\*Group Name(s): EASEE Study Group**

| <b>*First Name and Middle Initial(s)</b> | <b>*Last Name</b> | <b>*Suffix (eg, Jr, III)</b> | <b>Academic Degrees</b> | <b>Institution</b>                                                                   | <b>Location (city, state/province, country)</b> | <b>Role or Contribution, eg, chair, principal investigator</b> | <b>Group (if more than 1 Group listed in the byline) and/or Subgroup (eg, Steering Committee)</b> |
|------------------------------------------|-------------------|------------------------------|-------------------------|--------------------------------------------------------------------------------------|-------------------------------------------------|----------------------------------------------------------------|---------------------------------------------------------------------------------------------------|
| Valerie                                  | Borger            |                              | Dr.                     | Department of Neurosurgery, University of Bonn                                       | Bonn, Germany                                   | Device implantation, neurosurgical follow-up                   | EASEE Study Group                                                                                 |
| Frank                                    | Dewaele           |                              | Dr.                     | Department of Neurosurgery, University of Ghent                                      | Ghent, Belgium                                  | Device implantation, neurosurgical follow-up                   | EASEE Study Group                                                                                 |
| Mathias                                  | Kunz              |                              | PD Dr.                  | Department of Neurosurgery, LMU Munich                                               | Munich, Germany                                 | Device implantation, neurosurgical follow-up                   | EASEE Study Group                                                                                 |
| Georgios                                 | Naros             |                              | Dr.                     | Department of Neurosurgery and Neurotechnology, Eberhard Karls University, Tuebingen | Tuebingen, Germany                              | device implantation, neurosurgical follow-up                   | EASEE Study Group                                                                                 |
| Christopher                              | Nimsky            |                              | Prof. Dr.               | Department of Neurosurgery, University Hospital Marburg                              | Marburg, Germany                                | device implantation, neurosurgical follow-up                   | EASEE Study Group                                                                                 |
