# Supplementary material for: Focal Cortex Stimulation With a Novel Implantable Device and Antiseizure Outcomes in 2 Prospective Multicenter Single-Arm Trials
Source: PubMed Central journal article supplement — JAMA Neurol. 2023 Apr 3;80(6):588–96. doi: 10.1001/jamaneurol.2023.0066 (PMC10071400; doi:10.1001/jamaneurol.2023.0066), 2023-04-03
Supplement: jamaneurol-e230066-s006.pdf [file jamaneurol-e230066-s006.pdf]

## Data Sharing Statement

Schulze-Bonhage. Focal Cortex Stimulation With a Novel Implantable Device and Antiseizure Outcomes in 2 Prospective Multicenter Single-Arm Trials. *JAMA Neurol*. Published April 3, 2023. doi:10.1001/jamaneurol.2023.0066

### Data

**Data available:** No

### Additional Information

**Explanation for why data not available:** The data that support the findings of this study is pseudonymized only and is not publicly available on patient-level. A signed data sharing agreement is required before access to any data can be provided.
